# Supplementary material
Source: publisher figshare collection journal article supplement (https://acs.figshare.com/ndownloader/files/8760997)
Supplement: Supplementary file 1 [file 8760997]

code #,SMILES,A549,MDA-MB-231,KB,KB-VIN,MCF-7
6a,ClC1=NC2=CC=CC=C2C(N3C(C=CC(OC)=C4)=C4NC(C3)=O)=N1,0.53 ± 0.03,2.01 ± 0.73,0.59 ± 0.09,0.66 ± 0.17,0.76 ± 0.03
6b,O=C(C1)NC2=C(C=CC(OC)=C2)N1C3=NC(NC)=NC4=CC=CC=C43,1.01 ± 0.08,10.6 ± 1.71,1.68 ± 0.15,1.22 ± 0.10,0.84 ± 0.06
6c,COC(C=C1NC2=O)=CC=C1N(C2)C3=NC(NCC)=NC4=CC=CC=C43,0.57 ± 0.01,0.79 ± 0.01,0.54 ± 0.00,0.55 ± 0.01,0.84 ± 0.03
6d,COC(C=C1NC2=O)=CC=C1N(C2)C3=NC(NCCCC)=NC4=CC=CC=C43,5.25 ± 0.02,7.19 ± 0.01,5.25 ± 0.15,5.33 ± 0.00,7.88 ± 0.05
6e,COC(C=C1NC2=O)=CC=C1N(C2)C3=NC(NCCCO)=NC4=CC=CC=C43,5.18 ± 0.11,10.2 ± 0.68,4.92 ± 0.19,10.5 ± 0.42,7.43 ± 0.38
6f,O=C(C1)NC2=C(C=CC(OC)=C2)N1C3=NC(NC4CC4)=NC5=CC=CC=C53,1.12 ± 0.31,10.5 ± 0.94,2.11 ± 0.27,1.17 ± 0.24,1.08 ± 0.22
6g,O=C(C1)NC2=C(C=CC(OC)=C2)N1C3=NC(NC4CCCC4)=NC5=CC=CC=C53,7.67 ± 0.02,17.6 ± 1.77,6.92 ± 0.22,6.72 ± 0.39,7.67 ± 0.23
6h,COC(C=C1NC2=O)=CC=C1N(C2)C3=NC(N4CCCC4)=NC5=CC=CC=C53,45.0 ± 2.25,80.1 ± 4.62,33.2 ± 0.64,57.8 ± 0.79,241 ± 225
6i,COC(C=C1NC2=O)=CC=C1N(C2)C3=NC(N4CCC(F)(F)C4)=NC5=CC=CC=C53,5.71 ± 0.18,8.26 ± 0.36,4.66 ± 0.31,4.74 ± 0.17,8.31 ± 0.07
6j,COC(C=C1NC2=O)=CC=C1N(C2)C3=NC(N4CC(F)(F)C4)=NC5=CC=CC=C53,5.47 ± 0.05,8.86 ± 0.52,4.76 ± 0.06,4.80 ± 0.06,8.59 ± 0.09
6k,COC(C=C1NC2=O)=CC=C1N(C2)C3=NC(N4CC(OC)C4)=NC5=CC=CC=C53,17.5 ± 0.59,53.1 ± 3.73,8.26 ± 0.39,39.6 ± 0.51,8.60 ± 0.03
6l,O=C(C1)NC2=C(C=CC(OC)=C2)N1C3=NC(NC4=CC=C(C#N)C=C4)=NC5=CC=CC=C53,6.17 ± 0.09,8.31 ± 0.07,5.39 ± 0.26,8.02 ± 0.25,9.19 ± 0.24
6m,O=C(C1)NC2=C(C=CC(OC)=C2)N1C3=NC(NC4=CC=CC(C#N)=C4)=NC5=CC=CC=C53,75.4 ± 2.62,97.1 ± 2.77,61.5 ± 1.77,487 ± 20.0,384 ± 198
6n,O=C(C1)NC2=C(C=CC(OC)=C2)N1C3=NC(NCC4=CC=NC=C4)=NC5=CC=CC=C53,6.62 ± 0.28,73.6 ± 4.84,7.50 ± 0.68,48.8 ± 0.86,71.8 ± 7.76
6o,COC(C=C1NC2=O)=CC=C1N(C2)C3=NC(OCC4CC4)=NC5=CC=CC=C53,16.7 ± 0.43,15.4 ± 0.38,11.6 ± 0.67,10.8 ± 0.9,8.59 ± 0.19
6p,COC(C=C1NC2=O)=CC=C1N(C2)C3=NC(OCC)=NC4=CC=CC=C43,15.8 ± 4.09,45.2 ± 1.71,14.2 ± 3.16,7.23 ± 0.15,7.88 ± 0.05
6q,O=C(C1)NC2=C(C=CC(OC)=C2)N1C3=NC(COC(C)=O)=NC4=CC=CC=C43,5.52 ± 0.12,8.95 ± 0.65,5.05 ± 0.20,6.38 ± 0.37,33.0 ± 2.58
6r,O=C(C1)NC2=C(C=CC(OC)=C2)N1C3=NC(CO)=NC4=CC=CC=C43,5.35 ± 0.17,9.70 ± 0.32,5.29 ± 0.21,5.36 ± 0.16,10.8 ± 1.04
6s,O=C(C1)NC2=C(C=CC(OC)=C2)N1C3=NC(COCCCC(OCC)=O)=NC4=CC=CC=C43,202 ± 28.9,975 ± 51.2,280 ± 11.0,373 ± 42.9,1281 ± 63.2
6t,O=C(C1)NC2=C(C=CC(OC)=C2)N1C3=NC(COCCCC(NO[H])=O)=NC4=CC=CC=C43,550 ± 18.0,1015 ± 27.7,307 ± 5.05,646 ± 15.7,1213 ± 59.2
